# Supplementary material for: Thermal stability and phase transformation of electrochemically charged/discharged LiMnPO4 cathode for Li-ion batteries
Source: Royal Society of Chemistry journal article supplement (doi:10.1039/c1ee01501j), 2011-01-01
Supplement: c1ee01501j.pdf [file c1ee01501j.pdf]

## ***Supporting Information***

# **Thermal Stability and Phase Transformation of Electrochemically Charged/Discharged LiMnPO<sub>4</sub> Cathode for Li-Ion Battery**

Daiwon Choi\*, Jie Xiao, Young Joon Choi, John S. Hardy, M. Vijayakumar, M.S. Bhuvaneshwari,

Jun Liu, Wu Xu, Wei Wang, Zhenguo Yang, Gordon L. Graff and Ji-Guang Zhang\*

Pacific Northwest National Laboratory, 902 Battelle Boulevard P. O. Box 999, Richland, WA  
99352, USA

\*Corresponding author: daiwon.choi@pnl.gov; phone: 509-375-4341; fax: 509-375-4448

jiguang.zhang@pnl.gov; phone: 509-372-6515; fax: 509-375-3864

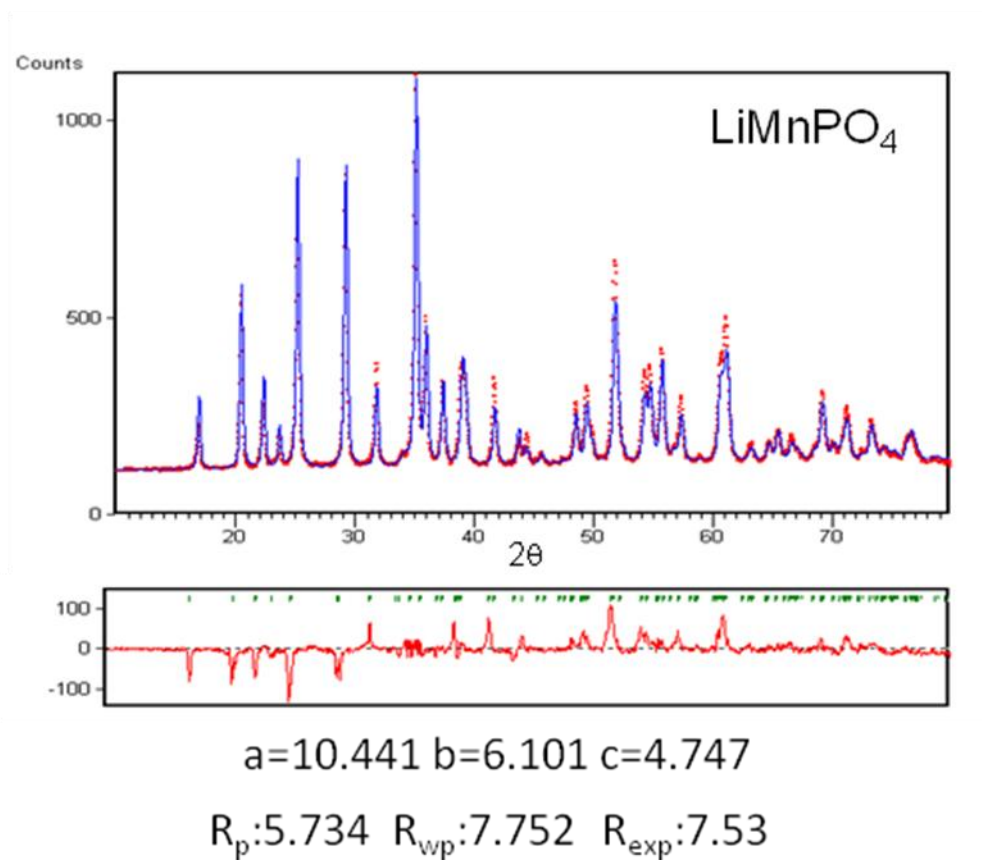

**Fig. S1** Rietveld refinement of XRD pattern from the as-prepared LiMnPO<sub>4</sub> nanoplate.

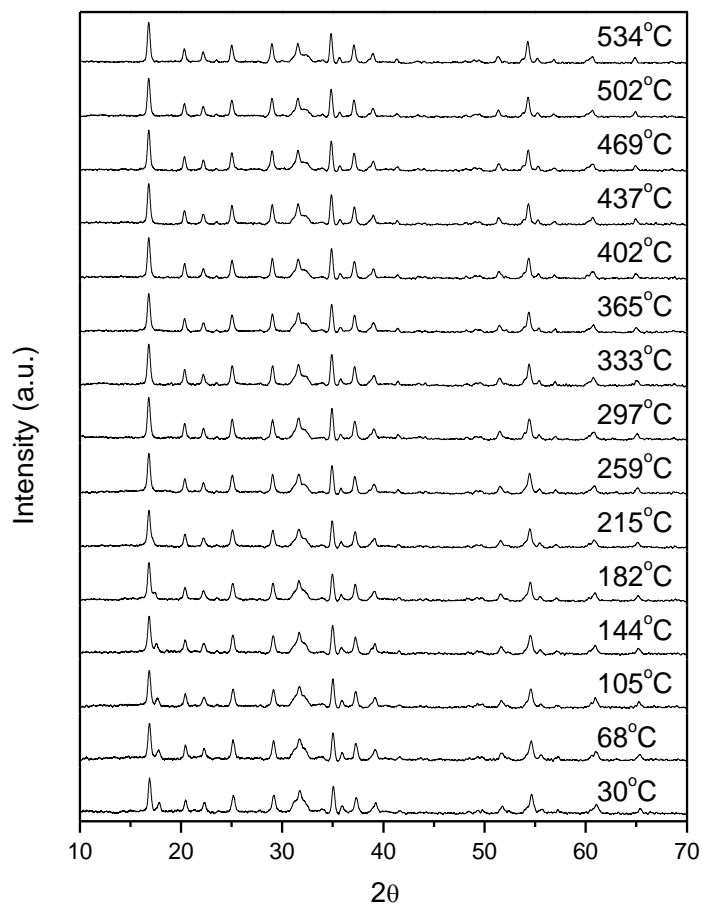

**Fig. S2** *In-situ* hot-stage XRD characterization of the discharged LiMnPO<sub>4</sub> paper electrode at different temperatures under UHP-Ar atmosphere (heating rate: 5°C/min).

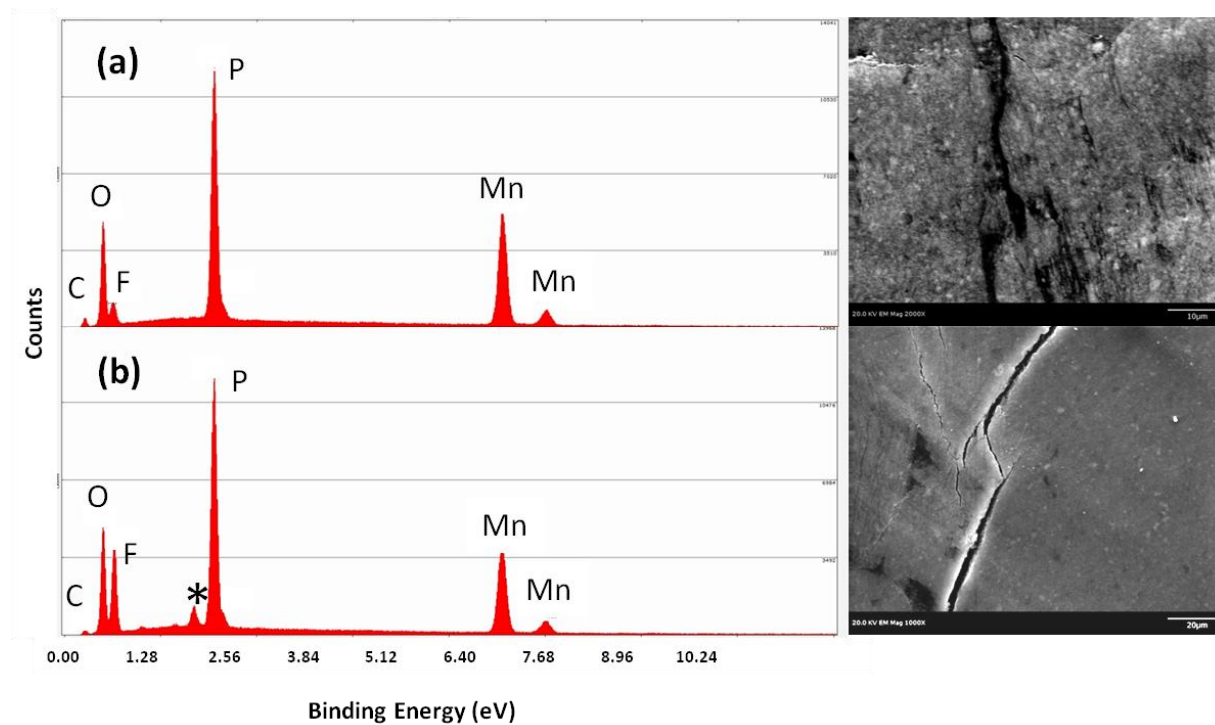

**Fig. S3** SEM micrographs and EDAX results of (a) as-prepared LiMnPO<sub>4</sub> paper electrode and (b) after electrochemically cycled LiMnPO<sub>4</sub> electrode at discharged state (\*: unknown).

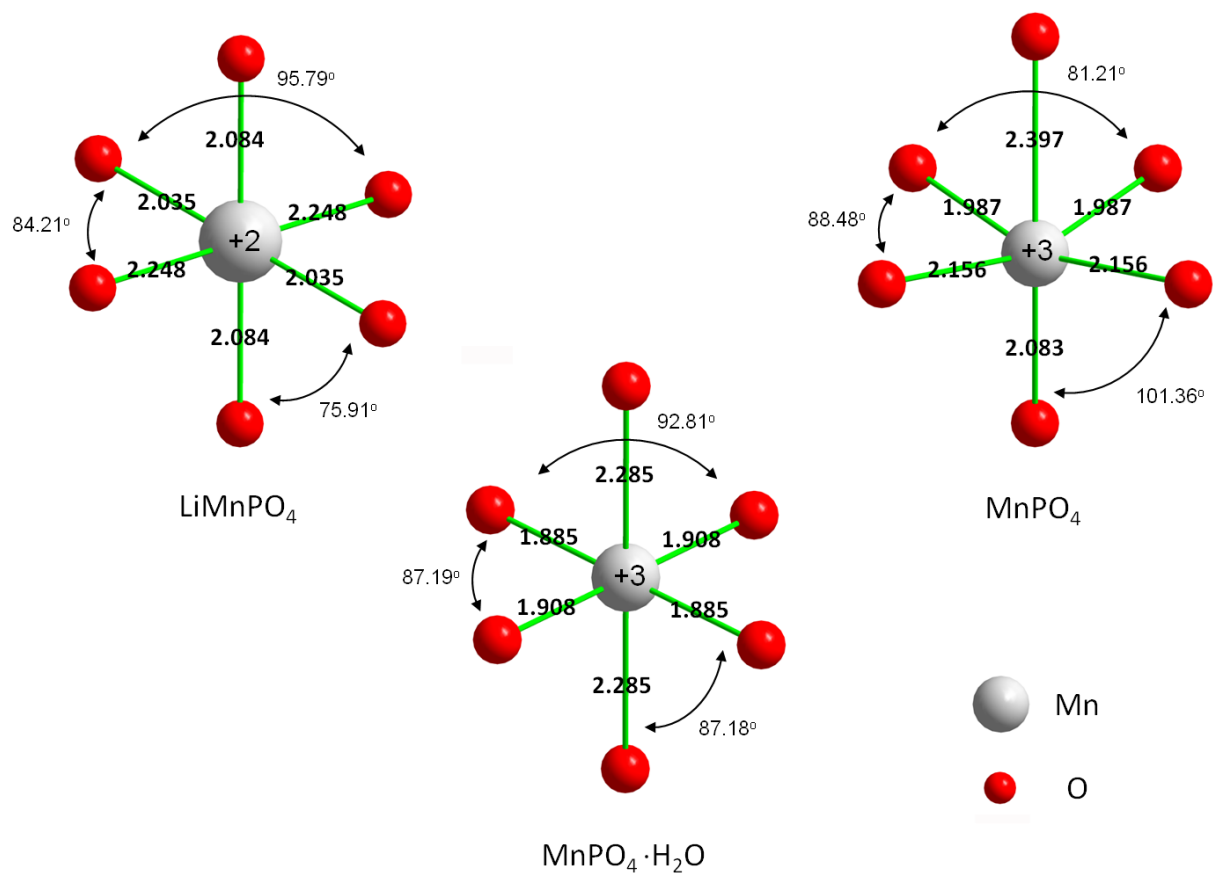

**Fig. S4** MnO<sub>6</sub> polyhedra in LiMnPO<sub>4</sub>, MnPO<sub>4</sub>·H<sub>2</sub>O and MnPO<sub>4</sub>.
